# Supplementary material for: The stability, characteristics and magnetic properties of iron carbide from an oolitic hematite
Source: Royal Society of Chemistry journal article supplement (doi:10.1039/c7ra07886b), 2017-01-01
Supplement: c7ra07886b1.pdf [file c7ra07886b1.pdf]

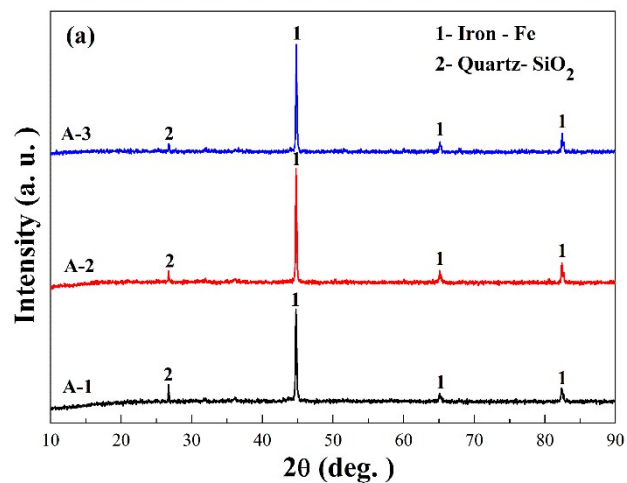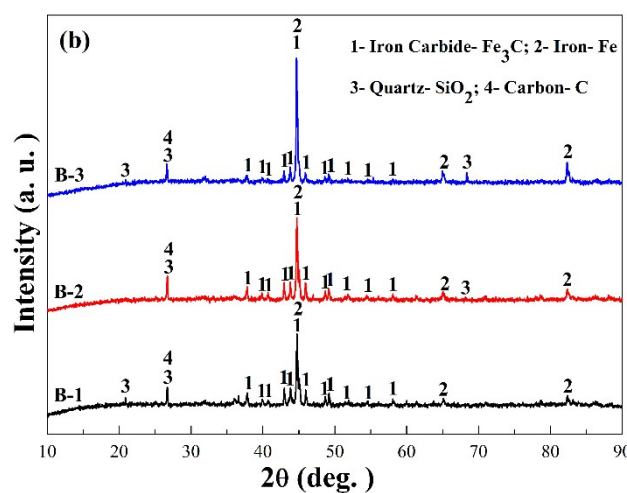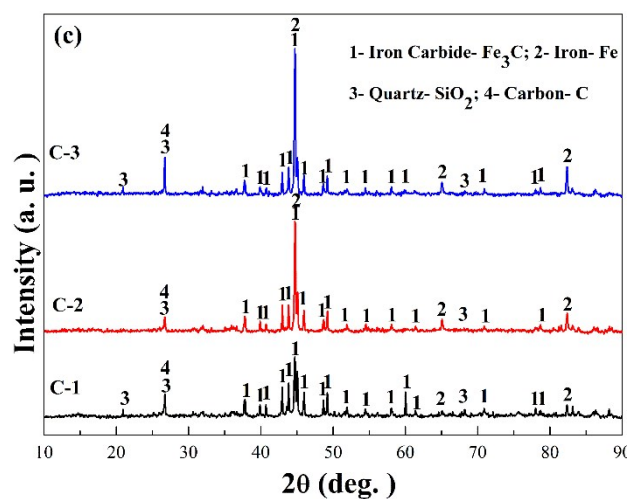

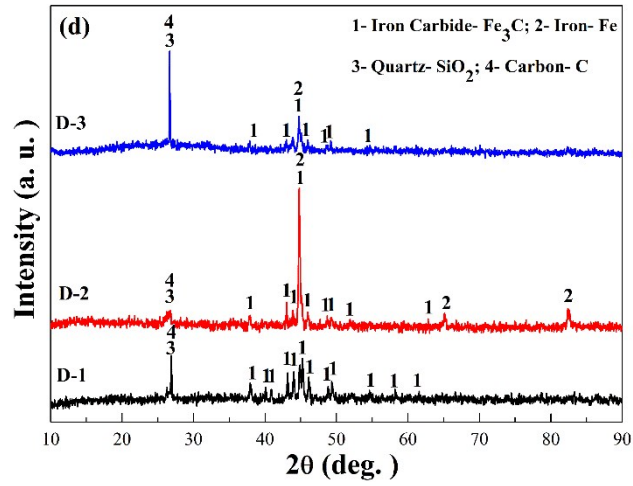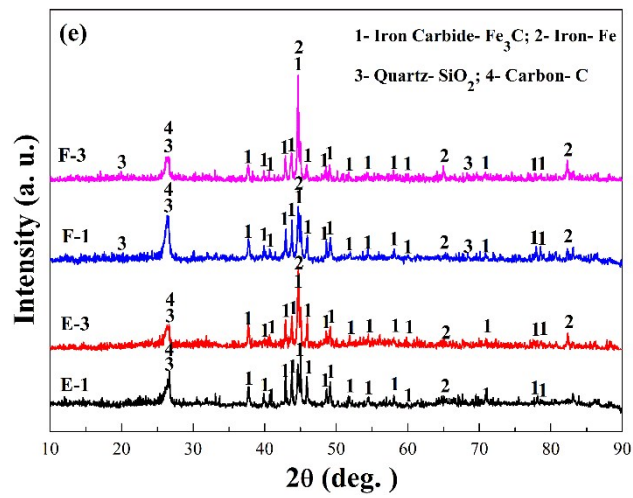

Figure S11: The XRD patterns of carburized specimens in different cooling conditions and reaction time; (a) A-1 to A-3; (b) B-1 to B-3; (c) C-1 to C-3; (d) D-1 to D-3; (e) E-1 to F-3 (the specific number are illustrated in Tables 2 and 3 in the paper)

Table S1 ASTM card, crystal system, and diffraction peak of materials detected in this work

| Material          | Number of ASTM card | Crystal system | Characteristic peak |         |
|-------------------|---------------------|----------------|---------------------|---------|
|                   |                     |                | hkl                 | 2θ(deg) |
| Fe <sub>3</sub> C | 00-035-0772         | Orthorhombic   | 121                 | 37.63   |
| Fe                | 01-089-7194         | Cubic          | 211                 | 82.34   |
| C                 | 00-001-0640         | Hexagonal      | 002                 | 26.35   |
| SiO <sub>2</sub>  | 01-086-1628         | Hexagonal      | 101                 | 26.69   |
